# Supplementary material
Source: publisher figshare collection journal article supplement (https://springernature.figshare.com/ndownloader/files/7107113)
Supplement: Supplementary file 1 [file 7107113]

|                                              |                                                                                                                                                                                                                                                                                                               |                                                     |                                              |
|----------------------------------------------|---------------------------------------------------------------------------------------------------------------------------------------------------------------------------------------------------------------------------------------------------------------------------------------------------------------|-----------------------------------------------------|----------------------------------------------|
| <b>SOYMILK</b><br>1 cup or 8 ounces          | <b>PLAIN</b><br>Select...<br>Select...<br>Never or rarely<br>1-3 per month<br>Once a week<br>2-4 per week<br>5-6 per week<br>Once a day<br>2-3 per day<br>4+ per day<br>Select...                                                                                                                             | <b>FLAVORED</b><br>Select...                        | <b>HOMEMADE</b><br>Select...                 |
| <b>OTHER MILK</b><br>1 cup or 8 ounces       |                                                                                                                                                                                                                                                                                                               | <b>RICE MILK</b><br>Select...                       |                                              |
| <b>JUICES</b><br>1 cup or 8 ounces           |                                                                                                                                                                                                                                                                                                               | <b>100% REAL FRUIT JUICE</b><br>Select...           | <b>FRUIT DRINKS</b><br>Select...             |
| <b>SMOOTHIES/SHAKES</b><br>1 cup or 8 ounces | <b>WITH MILK</b><br>Select...<br><div>Smoothies and shakes that contain fruits, fruit juice concentrates, chocolate and/or milk, soymilk, soy protein powder, or whey protein powder, and ice. Examples are Orange Julius, Boba Tea House, Starbucks, McDonald's. Include homemade shakes and smoothies</div> | <b>WITH SOYMILK/SOY PROTEIN POWDER</b><br>Select... | <b>WITH WHEY PROTEIN POWDER</b><br>Select... |
| <b>COFFEE</b><br>1 cup or 8 ounces           | <b>BLACK</b><br>Select...                                                                                                                                                                                                                                                                                     | <b>BLENDED WITH DAIRY</b><br>Select...              | <b>BLENDED WITH SOYMILK</b><br>Select...     |

---

|                                              |                                           |                                                                                                                                                                                                                         |                                              |
|----------------------------------------------|-------------------------------------------|-------------------------------------------------------------------------------------------------------------------------------------------------------------------------------------------------------------------------|----------------------------------------------|
| <b>MILK</b><br>1 cup or 8 ounces             | <b>REGULAR</b><br>Select...               | <b>LOW-FAT</b><br>Select...                                                                                                                                                                                             | <b>NON-FAT</b><br>Select...                  |
| <b>SOYMILK</b><br>1 cup or 8 ounces          | <b>PLAIN</b><br>Select...                 | <b>FLAVORED</b><br>Select...<br><div>Store-bought flavored soymilk—vanilla, chocolate, or strawberry—such as Silk Soy Vanilla, Silk Soy Chocolate, Eden Soy Vanilla, Natura Vanilla, Organic Valley vanilla, etc.</div> | <b>HOMEMADE</b><br>Select...                 |
| <b>OTHER MILK</b><br>1 cup or 8 ounces       | <b>ALMOND MILK</b><br>Select...           | <b>RICE MILK</b><br>Select...                                                                                                                                                                                           |                                              |
| <b>JUICES</b><br>1 cup or 8 ounces           | <b>100% REAL FRUIT JUICE</b><br>Select... | <b>FRUIT DRINKS</b><br>Select...                                                                                                                                                                                        |                                              |
| <b>SMOOTHIES/SHAKES</b><br>1 cup or 8 ounces | <b>WITH MILK</b><br>Select...             | <b>WITH SOYMILK/SOY PROTEIN POWDER</b><br>Select...                                                                                                                                                                     | <b>WITH WHEY PROTEIN POWDER</b><br>Select... |

Supplementary Figure C. Additional food information shows up when pointer hovers over the name of the food.
